# Supplementary material for: A comparison of biologically variable ventilation to recruitment manoeuvres in a porcine model of acute lung injury
Source: PubMed Central journal article supplement (PMC535805; doi:10.1186/1465-9921-5-22), 2004-11-24
Supplement: 1465-9921-5-22-S1.pdf [file 1465-9921-5-22-S1.pdf]

Table 1  
Temperature and Haemodynamics

|        | Pre OA       | Post OA      | 1 h           | 2 h           | 3 h           | 4 h           | 5 h           |
|--------|--------------|--------------|---------------|---------------|---------------|---------------|---------------|
| Temp   |              |              |               |               |               |               |               |
| BVV    | 37.0 ± 0.5 + | 37.1 ± 0.7   | 37.1 ± 0.8    | 36.6 ± 1.0 *  | 36.5 ± 1.1 *  | 36.3 ± 1.3 *  | 36.2 ± 1.3 *+ |
| CMV-RM | 36.3 ± 1.0   | 36.6 ± 1.2   | 37.0 ± 1.2    | 36.6 ± 1.1    | 36.5 ± 1.0    | 36.6 ± 1.3    | 36.8 ± 0.8    |
| CMV    | 36.8 ± 0.8   | 37.0 ± 1.1   | 37.0 ± 0.9 *  | 37.0 ± 1.1    | 37.0 ± 1.2    | 37.1 ± 1.2    | 37.1 ± 1.0    |
| MAP    |              |              |               |               |               |               |               |
| BVV    | 86 ± 15      | 85 ± 11      | 97 ± 11       | 105 ± 16 *    | 101 ± 14      | 97 ± 21       | 101 ± 22      |
| CMV-RM | 90 ± 16      | 75 ± 8       | 77 ± 17+      | 84 ± 20 +     | 84 ± 19 +     | 77 ± 26 +     | 83 ± 33 +     |
| CMV    | 86 ± 15      | 87 ± 18      | 100 ± 21 *    | 112 ± 20 *    | 104 ± 17      | 103 ± 28      | 104 ± 16 *    |
| MPAP   |              |              |               |               |               |               |               |
| BVV    | 17.8 ± 3.3   | 32.0 ± 3.7 * | 30.0 ± 3.6 *+ | 27.8 ± 4.3 *+ | 27.1 ± 3.9 *+ | 27.4 ± 4.0 *+ | 27.0 ± 4.4 *+ |
| CMV-RM | 18.4 ± 1.8   | 34.4 ± 4.4 * | 34.8 ± 3.3 *  | 32.9 ± 3.6 *  | 32.2 ± 4.6 *  | 31.3 ± 4.4 *  | 32.0 ± 7.7 *  |
| CMV    | 20.1 ± 2.7   | 37.3 ± 8.5 * | 36.4 ± 6.4 *  | 36 ± 5.4 *    | 34.3 ± 7.6 *  | 34.3 ± 5.5 *  | 36.9 ± 8.4 *  |
| PAOP   |              |              |               |               |               |               |               |
| BVV    | 8.3 ± 1.7 +  | 10.3 ± 1.7 * | 9.8 ± 2.3 +   | 10.1 ± 2.1 *  | 10.3 ± 1.6 *  | 9.9 ± 2.2     | 9.6 ± 2.3     |
| CMV-RM | 9.8 ± 1.6    | 10.9 ± 1.5   | 12.3 ± 3.6 *  | 11.6 ± 1.1    | 11.1 ± 1.4    | 10.8 ± 1.2    | 10.3 ± 1.5    |
| CMV    | 9.5 ± 1.6    | 11.5 ± 1.4 * | 11.9 ± 2.7 *  | 11.0 ± 1.1    | 11.0 ± 1.1    | 10.6 ± 0.9    | 11.5 ± 1.4 *  |
| CO     |              |              |               |               |               |               |               |
| BVV    | 4.5 ± 0.5    | 3.3 ± 0.7 *  | 3.1 ± 0.7 *   | 2.9 ± 0.7 *   | 3.0 ± 0.5 *   | 3.0 ± 0.6 *   | 3.0 ± 0.5 *   |
| CMV-RM | 4.1 ± 0.6    | 2.6 ± 0.8 *  | 2.2 ± 0.7 *+  | 2.3 ± .07 *   | 2.2 ± 0.9 *+  | 2.5 ± 0.9 *   | 2.5 ± 1.0 *   |
| CMV    | 4.4 ± 1.5    | 3.1 ± 1.0 *  | 2.9 ± 0.9 *   | 2.7 ± 1.1 *   | 2.9 ± 1.3 *   | 3.1 ± 1.7 *   | 3.4 ± 1.9 *   |

MAP = Mean Arterial Pressure (mm Hg)

MPAP = Mean Pulmonary Arterial Pressure (mm Hg)

PAOP = Pulmonary Artery Occlusion Pressure (mm Hg)

CO = Cardiac Output (L/min)

\* P< .05 Within Groups

+ P< .05 Between Groups
