# Supplementary material for: A comparison of biologically variable ventilation to recruitment manoeuvres in a porcine model of acute lung injury
Source: PubMed Central journal article supplement (PMC535805; doi:10.1186/1465-9921-5-22), 2004-11-24
Supplement: 1465-9921-5-22-S2.pdf [file 1465-9921-5-22-S2.pdf]

Table 2  
Respiratory Gas and Derived Data

|                                    | Pre OA     | Post OA      | 1 h           | 2 h           | 3 h          | 4 h           | 5 h           |
|------------------------------------|------------|--------------|---------------|---------------|--------------|---------------|---------------|
| <b>PaCO<sub>2</sub></b>            |            |              |               |               |              |               |               |
| BVV                                | 39.7 ± 3.5 | 53.4 ± 7.1 * | 59.8 ± 11.0 * | 54.3 ± 9.4 *  | 52.7 ± 7.2 * | 52.2 ± 6.3 *  | 52.0 ± 6.8 *  |
| CMV-RM                             | 38.3 ± 3.8 | 49.9 ± 3.6 * | 54.1 ± 6.1 *  | 55.2 ± 11.0 * | 51.5 ± 6.8 * | 49.9 ± 7.0 *  | 49.4 ± 6.2 *  |
| CMV                                | 40.0 ± 2.8 | 53.9 ± 7.1 * | 55.8 ± 9.5 *  | 54.2 ± 9.4 *  | 50.8 ± 7.9 * | 49.7 ± 7.9 *  | 48.9 ± 6.8 *  |
| <b>PvO<sub>2</sub></b>             |            |              |               |               |              |               |               |
| BVV                                | 42.2 ± 3.7 | 39.0 ± 2.7 + | 40.7 ± 4.2    | 41.3 ± 5.2    | 40.5 ± 4.4   | 39.9 ± 3.5    | 39.5 ± 2.4    |
| CMV-RM                             | 43.8 ± 5.8 | 37.0 ± 4.7 * | 34.8 ± 8.8 *+ | 36.2 ± 6.8 *  | 35.6 ± 4.7 * | 35.0 ± 7.7 *+ | 32.3 ± 8.4 *+ |
| CMV                                | 42.2 ± 4.0 | 38.3 ± 3.9 * | 39.1 ± 3.5    | 38.3 ± 4.2 *  | 37.9 ± 4.2 * | 38.1 ± 2.4 *  | 38.1 ± 3.2 *  |
| <b>pHa</b>                         |            |              |               |               |              |               |               |
| BVV                                | 7.45 ± .03 | 7.32 ± .05 * | 7.29 ± .07 *  | 7.32 ± .07 *  | 7.34 ± .06 * | 7.35 ± .06 *  | 7.35 ± .07 *  |
| CMV-RM                             | 7.46 ± .03 | 7.33 ± .04 * | 7.26 ± .08 *  | 7.31 ± .05 *  | 7.33 ± .04 * | 7.35 ± .04 *  | 7.34 ± .03 *  |
| CMV                                | 7.46 ± .03 | 7.33 ± .04 * | 7.26 ± .08 *  | 7.35 ± .03 *  | 7.33 ± .04 * | 7.35 ± .04 *  | 7.34 ± .03 *  |
| <b>Q<sub>S</sub>/Q<sub>T</sub></b> |            |              |               |               |              |               |               |
| BVV                                | 3.0 ± 1.9  | 22.1 ± 6.1 * | 15.1 ± 8.7 *  | 7.8 ± 4.3     | 6.7 ± 4.7 +  | 5.4 ± 3.7     | 6.5 ± 5.0 +   |
| CMV-RM                             | 3.6 ± 3.9  | 22.0 ± 8.3 * | 24.3 ± 17.6 * | 16.4 ± 8.5 *  | 16.8 ± 9.8 * | 13.2 ± 6.8 *  | 15.4 ± 9.2 *  |
| CMV                                | 4.1 ± 2.4  | 23.7 ± 5.8 * | 14.2 ± 4.9 *  | 12.9 ± 6.6 *  | 12.8 ± 6.5 * | 11.1 ± 4.9 *  | 12.8 ± 5.4 *  |

PaCO<sub>2</sub> = Arterial Partial Pressure CO<sub>2</sub> (mm Hg)

PvO<sub>2</sub> = Mixed Venous Partial Pressure O<sub>2</sub> (mm Hg)

pHa = Arterial pH

Q<sub>S</sub>/Q<sub>T</sub> = Shunt Fraction (%)

\* p < .05 Within Groups

+ p < .05 Between Groups
